# Supplementary material
Source: PubMed Central journal article supplement (PMC1413716)
Supplement: pnas_0510441103_3.pdf [file pnas_0510441103_3.pdf]

# Mantle Cell Lymphoma Cases

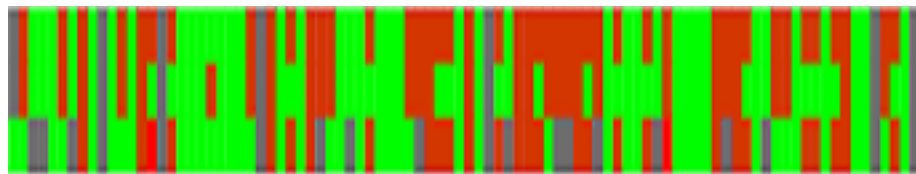

*ATM* status

all aberrations  
genomic deletions  
mutations

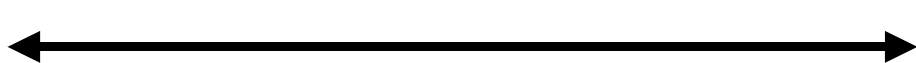

Low

High

Proliferation  
Signature
