# Supplementary material
Source: PubMed Central journal article supplement (PMC1413716)
Supplement: pnas_0510441103_4.pdf [file pnas_0510441103_4.pdf]

# Mantle Cell Lymphoma Cases

*p53* status

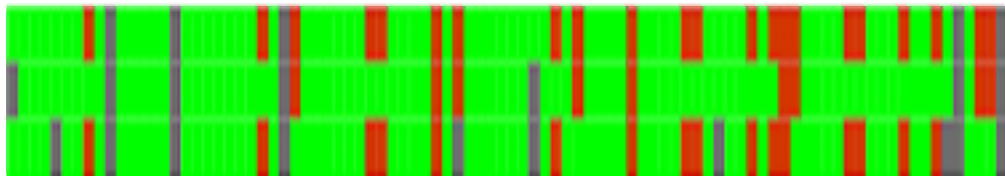

all aberrations  
genomic del  
mutations

Proliferation  
signature

Low

High
