# Supplementary material
Source: PubMed Central journal article supplement (PMC1413716)
Supplement: pnas_0510441103_5.pdf [file pnas_0510441103_5.pdf]

MCL Lym647 Mut  
MCL Lym539 Mut  
MCL Lym529 Mut  
MCL Lym565 Mut  
MCL Lym549 Mut  
MCL Lym592 Mut  
MCL Lym614 Mut  
MCL Lym590 Mut  
MCL Lym551 Mut  
MCL Lym599 Mut  
MCL Lym504 Mut  
MCL Lym560 Mut  
MCL Lym533 Mut  
MCL Lym658 Mut  
MCL Lym537 Mut  
MCL Lym560 Mut  
MCL Lym533 Mut  
MCL Lym601 Mut  
MCL Lym531 Mut  
MCL Lym519 Mut  
MCL Lym510 Mut  
MCL Lym528 Mut  
MCL Lym520 Mut  
MCL Lym655 Mut  
MCL Lym501 Mut  
MCL Lym594 Mut  
MCL Lym657 Mut  
MCL Lym608 Mut  
MCL Lym550 Mut  
MCL Lym522 Mut  
MCL Lym541 Mut  
MCL Lym586 Mut  
MCL Lym568 Mut  
MCL Lym544 Mut  
MCL Lym593 Mut  
MCL Lym587 Mut  
MCL Lym516 Mut  
MCL Lym644 Mut  
MCL Lym613 Mut  
MCL Lym512 Mut  
MCL Lym521 Mut  
MCL Lym564 Mut  
MCL Lym600 Mut  
MCL Lym561 Mut  
MCL Lym153 Mut  
MCL Lym534 Mut  
MCL Lym543 Mut  
MCL Lym632 Mut  
MCL Lym610 Mut  
MCL Lym602 Mut  
MCL Lym547 Mut  
MCL Lym659 Mut  
MCL Lym558 Mut  
MCL Lym653 Mut

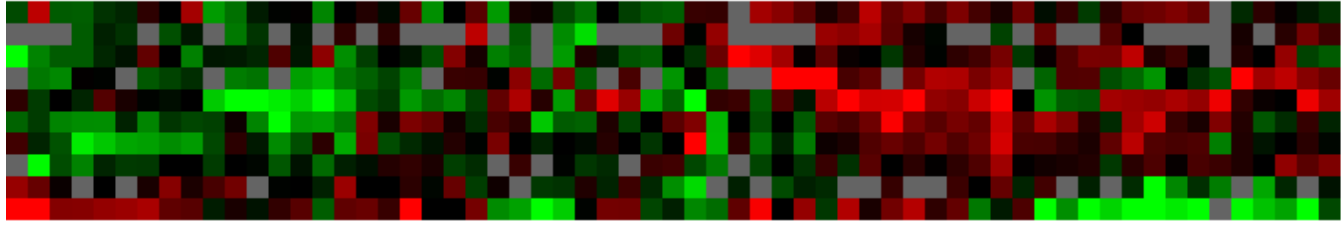

MCL Lym551 Del  
MCL Lym599 Del  
MCL Lym504 Del  
MCL Lym618 Del  
MCL Lym533 Del  
MCL Lym666 Del  
MCL Lym595 Del  
MCL Lym625 Del  
MCL Lym528 Del  
MCL Lym647 Del  
MCL Lym554 Del  
MCL Lym621 Del  
MCL Lym531 Del  
MCL Lym650 Del  
MCL Lym624 Del  
MCL Lym622 Del  
MCL Lym604 Del  
MCL Lym623 Del  
MCL Lym523 Del  
MCL Lym508 Del  
MCL Lym614 Del  
MCL Lym529 Del  
MCL Lym519 Del  
MCL Lym658 Del  
MCL Lym524 Del  
MCL Lym607 Del  
MCL Lym532 Del  
MCL Lym560 Del  
MCL Lym505 Del  
MCL Lym562 Del  
MCL Lym652 Mut  
MCL Lym503 Mut  
MCL Lym586 Mut  
MCL Lym558 Mut  
MCL Lym653 Mut  
MCL Lym550 Mut  
MCL Lym522 Mut  
MCL Lym632 Mut  
MCL Lym587 Mut  
MCL Lym644 Mut  
MCL Lym593 Mut  
MCL Lym561 Mut  
MCL Lym534 Mut  
MCL Lym602 Mut  
MCL Lym568 Mut  
MCL Lym613 Mut  
MCL Lym659 Mut  
MCL Lym547 Mut  
MCL Lym610 Mut  
MCL Lym543 Mut  
MCL Lym541 Mut  
MCL Lym516 Mut  
MCL Lym544 Mut  
MCL Lym600 Mut  
MCL Lym657 Mut  
MCL Lym512 Mut  
MCL Lym521 Mut  
MCL Lym501 Mut  
MCL Lym564 Mut  
MCL Lym608 Mut  
MCL Lym594 Mut

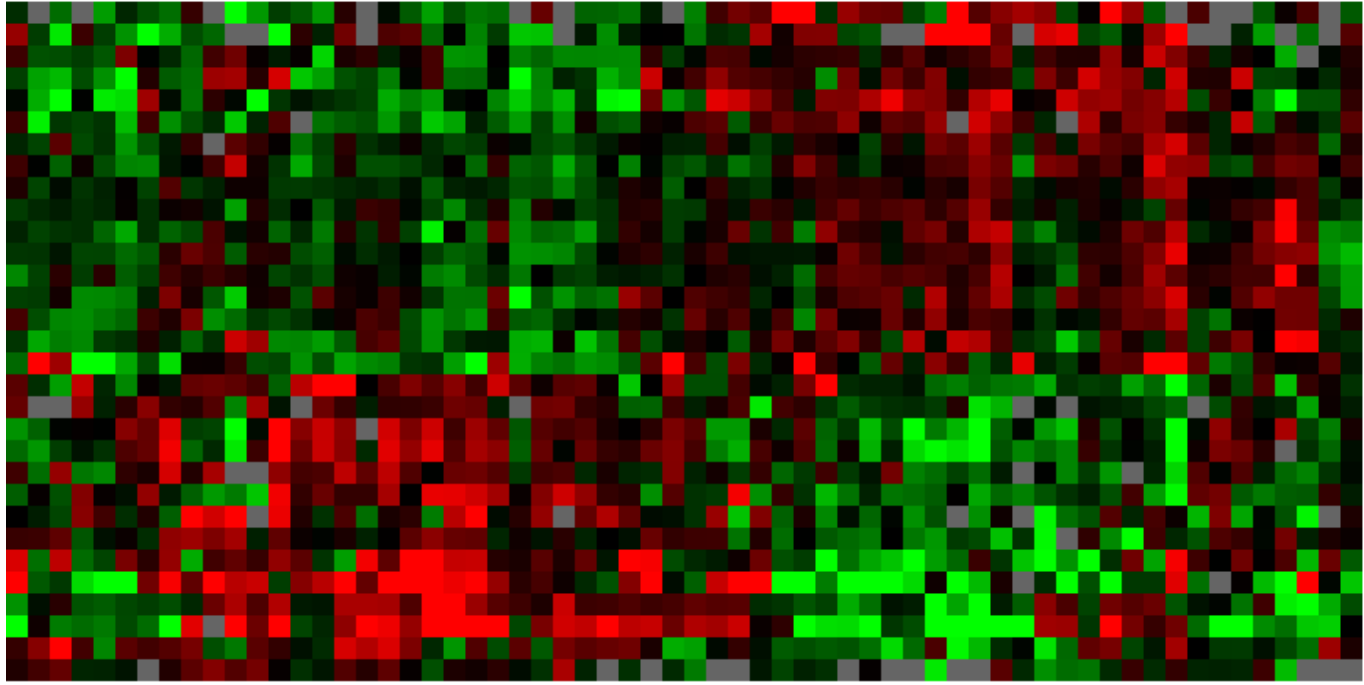

A

B
