# Supplementary material
Source: PubMed Central journal article supplement (PMC1413716)

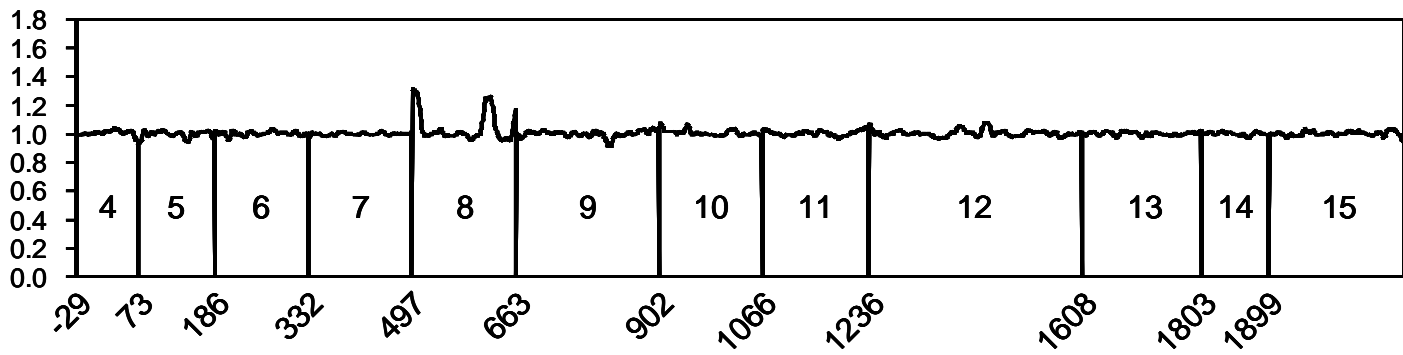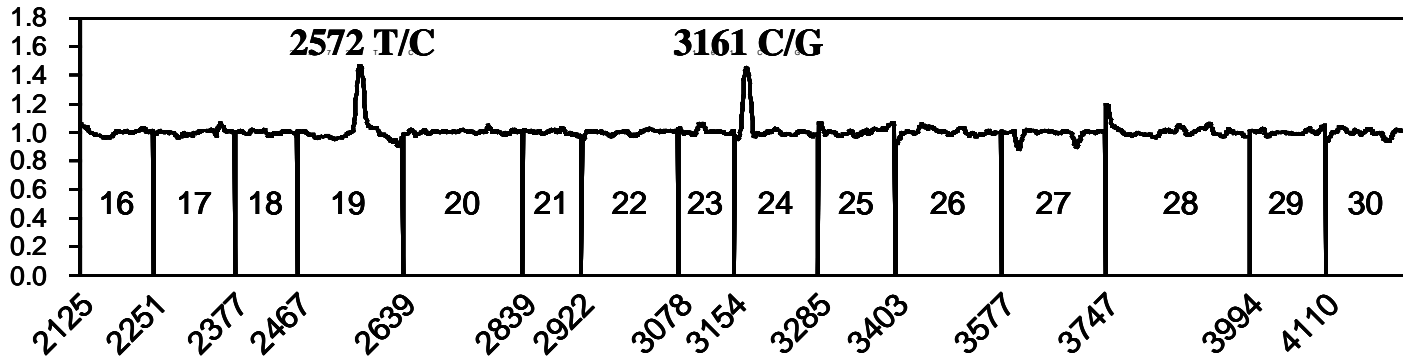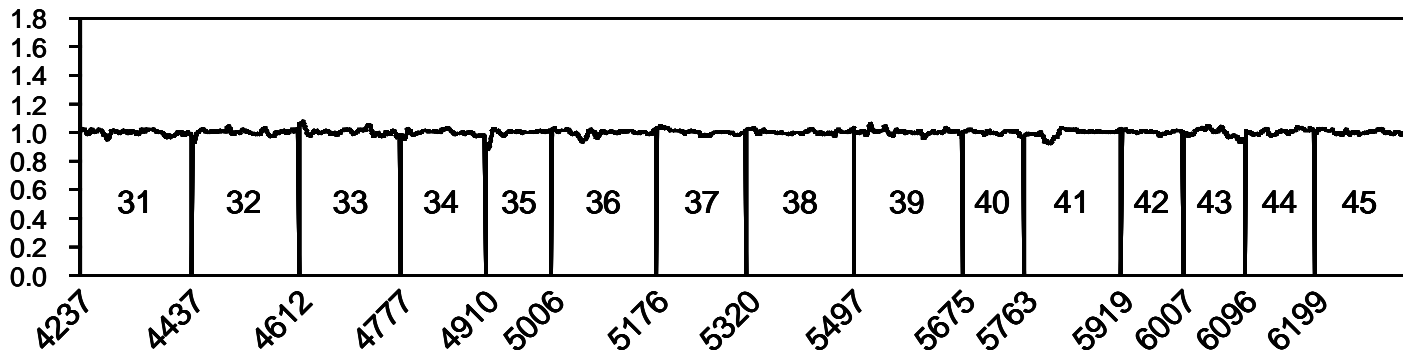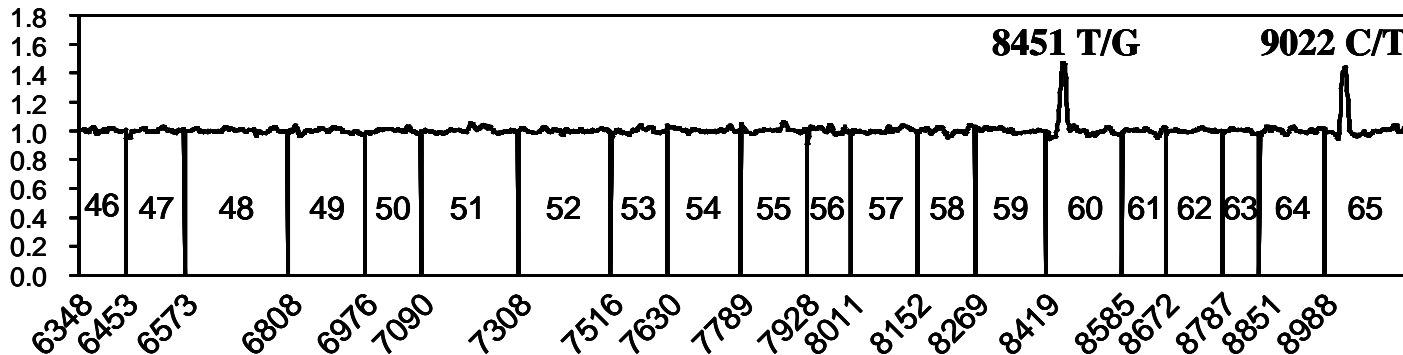

Supplement: pnas_0510441103_1.pdf [file pnas_0510441103_1.pdf]

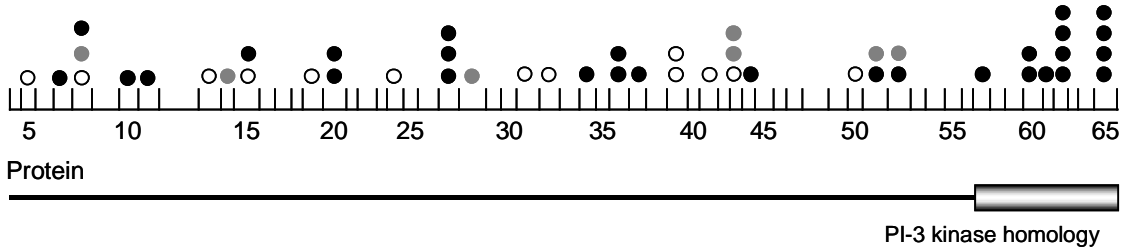

Supplement: pnas_0510441103_2.pdf [file pnas_0510441103_2.pdf]

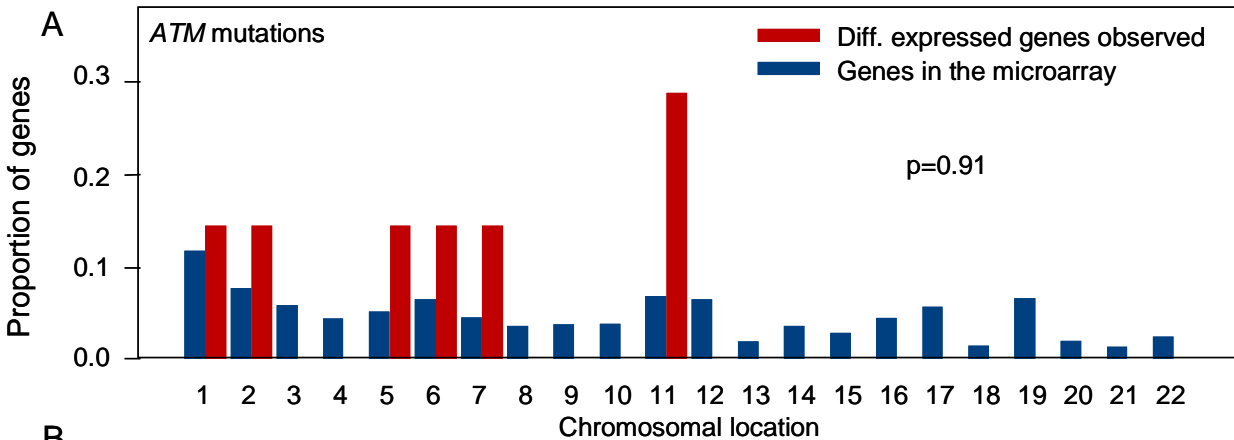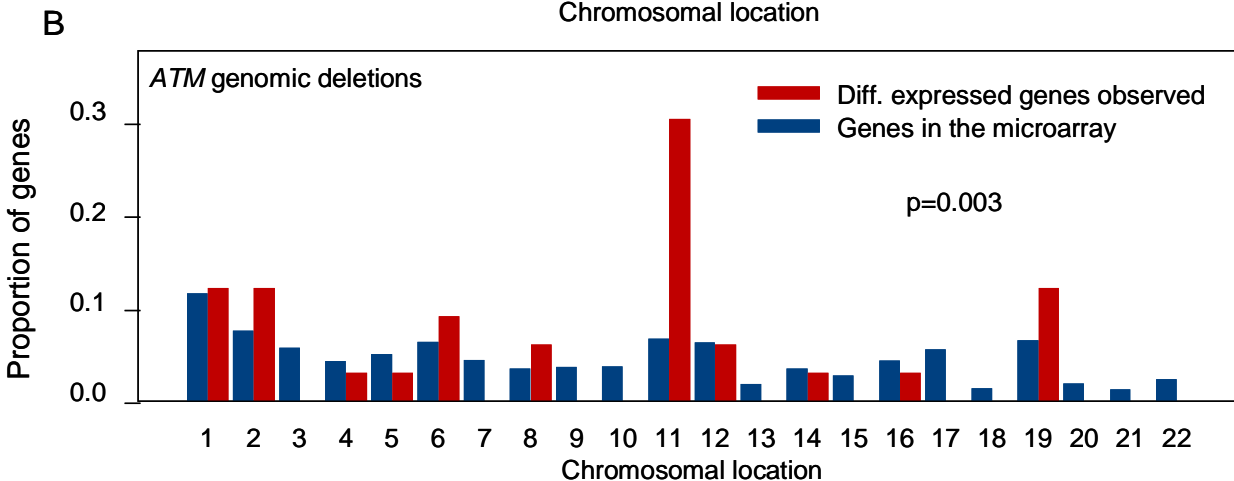

Greiner et al. Fig. 7

Supplement: pnas_0510441103_6.pdf [file pnas_0510441103_6.pdf]

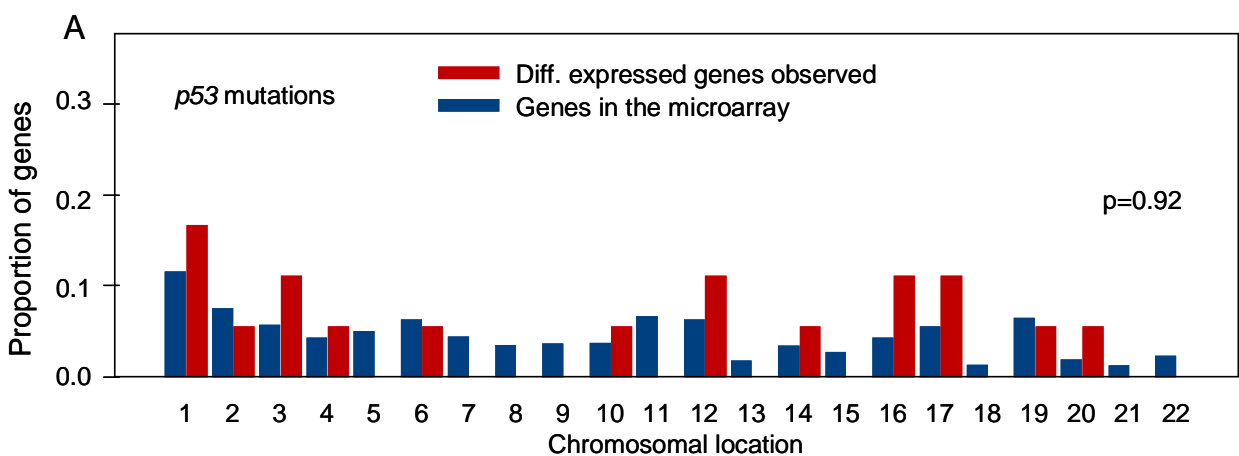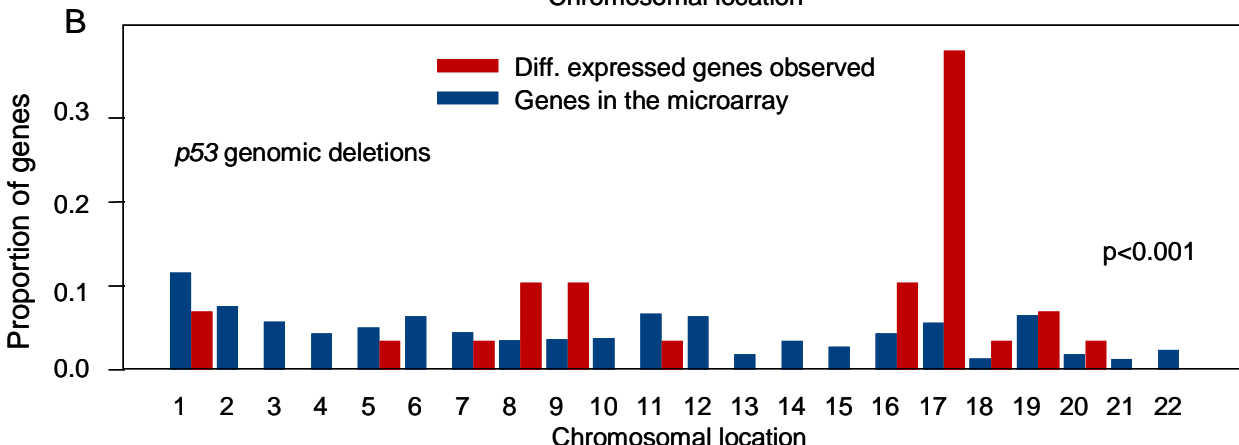

Supplement: pnas_0510441103_8.pdf [file pnas_0510441103_8.pdf]
